# Supplementary material
Source: publisher site journal article supplement (https://www.spandidos-publications.com/5707/downloadSupplementary)

Figure S1. Kaplan-Meier curves of the OS of patients in each subgroup in groups A and B. The OS of the two cohorts was compared in the (A) G0 subgroup ( $P=0.947$ ), (B) G1 subgroup ( $P=0.294$ ), and (C) G2 subgroup ( $P=0.671$ ). The differences among each cohort were not significant ( $P>0.05$ ). OS, overall survival.

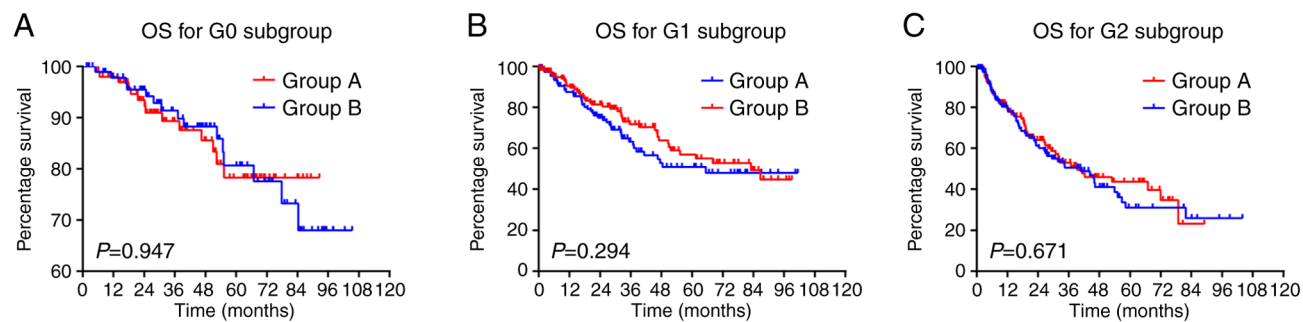

Figure S2. Kaplan-Meier curves of the RFS of patients in each subgroup in groups A and B. The RFS of the two cohorts was compared in the (A) G0 subgroup ( $P=0.927$ ), and the (B) G1 subgroup ( $P=0.171$ ). The differences among each cohort were not significant ( $P>0.05$ ). RFS, relapse-free survival.

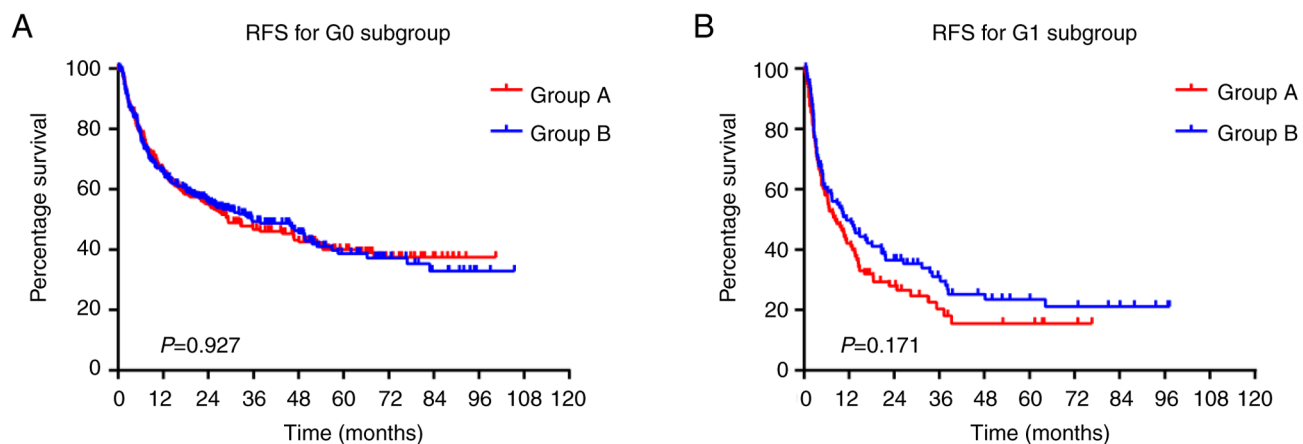

Supplement: Supplementary file 1 [file downloadSupplementary]
